# Supplementary material for: Assessment of work-related asthma prevalence, control and severity: protocol of a field study
Source: Springer Nature journal article supplement (doi:10.1186/s12889-016-3824-0), 2016-11-16
Supplement: MOESM1 [file 12889_2016_3824_MOESM1_ESM.pdf]

Additional file 1 – Items used to determine the status of potential asthmatic subject

|                                                                                                                 |                              |                             |
|-----------------------------------------------------------------------------------------------------------------|------------------------------|-----------------------------|
| 1. Are you currently taking asthma medication?                                                                  | Yes <input type="checkbox"/> | No <input type="checkbox"/> |
| 2. At any time in the last 12 months, have you:                                                                 |                              |                             |
| a) had an asthma attack?                                                                                        | Yes <input type="checkbox"/> | No <input type="checkbox"/> |
| b) had wheezing in your chest?                                                                                  | Yes <input type="checkbox"/> | No <input type="checkbox"/> |
| c) been woken up with a feeling of tightness in your chest first thing in the morning?                          | Yes <input type="checkbox"/> | No <input type="checkbox"/> |
| d) had an attack of shortness of breath that came on during the day when you were not doing anything strenuous? | Yes <input type="checkbox"/> | No <input type="checkbox"/> |
| e) had wheezing in your chest after doing something strenuous?                                                  | Yes <input type="checkbox"/> | No <input type="checkbox"/> |
| f) been woken up at night by an attack of shortness of breath?                                                  | Yes <input type="checkbox"/> | No <input type="checkbox"/> |
| g) been woken up at night by a coughing fit?                                                                    | Yes <input type="checkbox"/> | No <input type="checkbox"/> |
| 3. During your work shift or within the following few hours, do you happen to:                                  |                              |                             |
| a) start to cough?                                                                                              | Yes <input type="checkbox"/> | No <input type="checkbox"/> |
| b) start having wheezing in your chest when breathing?                                                          | Yes <input type="checkbox"/> | No <input type="checkbox"/> |
| c) have shortness of breath, a feeling of oppression or tightness in your chest?                                | Yes <input type="checkbox"/> | No <input type="checkbox"/> |
